# Supplementary material
Source: publisher figshare collection journal article supplement (https://asha.figshare.com/articles/dataset/_/19090088)

**Supplemental Material S2.** Frequency of frame rates present in videofluoroscopic studies in assessment of penetration aspiration scale (*N* = 18).

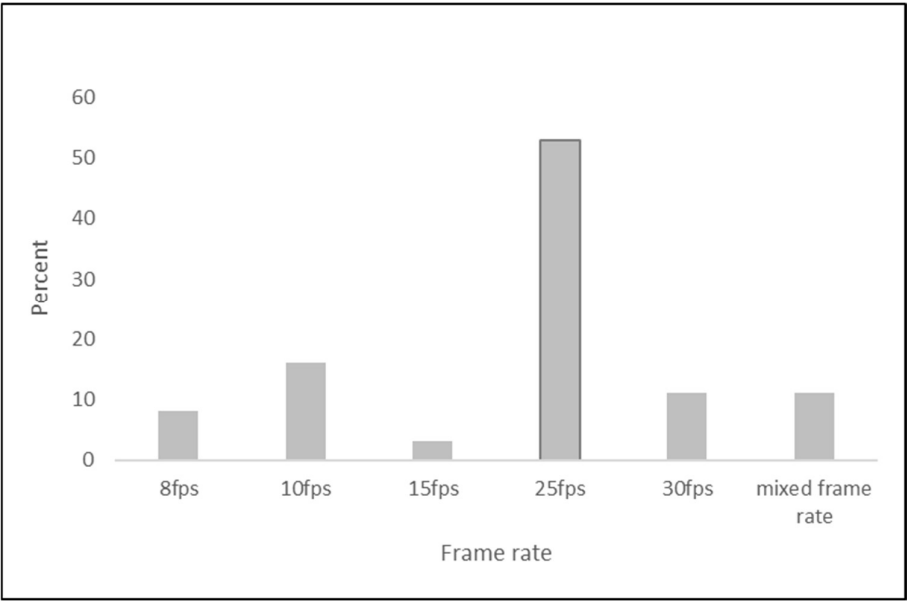

Supplement: Supplementary file 1 [file 1]
